# Supplementary material for: Time-dependent modeling of Alfvénic precipitation observed in the ionosphere
Source: Copernicus journal article supplement (doi:10.5194/angeo-44-1-2026), 2026-01-12
Supplement: Supplementary file [file angeo-44-1-2026-supplement-title-page.pdf › angeo-44-1-2026-supplement-title-page.pdf]

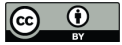

*Supplement of*

## **Time-dependent modeling of Alfvénic precipitation observed in the ionosphere**

**Etienne Gavazzi et al.**

*Correspondence to:* Etienne Gavazzi ([etienne.gavazzi@uit.no](mailto:etienne.gavazzi@uit.no))

- [angeo-44-1-2026-supplement-title-page.pdf](#)
- [animation\\_with\\_precipitation.mp4](#)

The copyright of individual parts of the supplement might differ from the article licence.
